# Supplementary material
Source: HighWire-hosted journal article supplement (https://openres.ersjournals.com/content/7/2/00050-2021)
Supplement: inline-supplementary-material-2 [file inline-supplementary-material-2.xlsx]

## Sheet: SLP Reference Range Calculator
Please Insert Subject Details in the ENTER Column
The current reference ranges are based on 198 measurements on seated normal subjects (no history or respiratory disease).
Subject Info			SLP Parameter	Observed (measured)	Expected value (predicted)	LLN* (lower 2.5%)	ULN* (upper 2.5%)	z-score (provided only if there is an observed value manually entered)*
	ENTER*			Enter to see z-scores (optional)
ID	SubjectX		RR (brpm)	11.7	14.9643	9.43723	23.7284	-1.04622
Age (year)	52		Ti (sec)	1.33	1.58008	1.05859	2.59785	-0.796853
Height (cm)	172		Te (sec)	3.67	2.39225	1.44826	3.95156	1.67132
Sex (M:F)	M		Ti/Ttot (duty cycle)	0.27	0.405277	0.338344	0.472209	-3.96135
			Relative thoracic contribution (%)	53	52.3871	29.4268	75.3473	0.0523244
			Breath Phase (degrees)	5.8	3.45307	1.63822	9.7713	0.984234
			IE50	2.74	1.29447	0.955854	1.87589	3.5586
*Valid range for Age is between 2 to 75, for Height is between 82 to 194cm and valid Sex entries are only M and F
*LLN and ULN correspond to z=-1.96 and z=1.96 respectivly
*Color code for z-scores:			Green if z-score betewen -1.28 and 1.28	Yellow: 1.28<abs(z)<1.64	Orange: 1.64<abs(z)<1.96	Red: abs(z)>1.96
Please ensure entries for Age are in years and entries for Height are in cm.
